# Supplementary material for: Cross-Sectional Study on the Prevalence of PCV Types 2 and 3 DNA in Suckling Piglets Compared to Grow–Finish Pigs in Downstream Production
Source: MDPI journal article supplement (doi:10.3390/pathogens11060671), 2022-06-10
Supplement: s1 [file s1]

**Table S1.** Overview on the single farm specifications (ff: farrow to finish farm; Ery: *Erysipelothrix rhusiopathiae*; PPV: Porcine parvovirus; IAV: Influenza A virus).

| Farm | Federal state          | TYPE of FARM  | Number of Sows | Vaccination Sows                           | Vaccination Piglets  | Batch System (Weeks)/Suckling Period (Days) |
|------|------------------------|---------------|----------------|--------------------------------------------|----------------------|---------------------------------------------|
| 1    | Bavaria                | ff            | 180            | Ery-PPV/IAV                                | PCV2 / M.hyo         | 4 / 21                                      |
| 2    | Bavaria                | ff            | 180            | APP / PRRSV Ery-PPV                        | PCV2 / M.hyo / PRRSV | 5 / 28                                      |
| 3    | North Rhine-Westphalia | 1:1 connected | 470            | M.hyo / APP / PRRSV / IAV / Ery-PPV        | PCV2 / M.hyo / PRRSV | 1.5 / 28                                    |
| 4    | Lower Saxony           | 1:1 connected | 400            | PRRSV / PCV2 / Ery-PPV / IAV               | PCV2 / M.hyo / PRRSV | 2 / 21                                      |
| 5    | Baden-Wuerttemberg     | ff            | 360            | PCV2 / PRRSV / IAV / Ery-PPV               | PCV2 / M.hyo / PRRSV | 1.5 / 28                                    |
| 6    | Schleswig-Holstein     | ff            | 160            | M.hyo / PCV2 / PRRSV / IAV / Ery-PPV       | PCV2 / M.hyo / PRRSV | 1 / 28                                      |
| 7    | Lower Saxony           | ff            | 160            | APP / PRRSV                                | PCV2 / M.hyo         | 3 / 28                                      |
| 8    | Baden-Wuerttemberg     | ff            | 120            | Ery-PPV                                    | PCV2 / M.hyo / PRRSV | 3 / 28                                      |
| 9    | North Rhine-Westphalia | ff            | 320            | PRRSV / IAV / Ery-PPV                      | PCV2 / M.hyo         | 2 / 21                                      |
| 10   | Bavaria                | ff            | 250            | Ery-PPV                                    | PCV2 / M.hyo         | 1 / 28                                      |
| 11   | North Rhine-Westphalia | ff            | 380            | PRRSV / IAV / Ery-PPV                      | PCV2 / M.hyo         | 1 / 28                                      |
| 12   | North Rhine-Westphalia | ff            | 145            | M.hyo / PCV2 / PRRSV / IAV / Ery-PPV       | PCV2 / M.hyo / PRRSV | 4 / 21                                      |
| 13   | Upper Austria          | ff            | 120            | APP / M.hyo PCV2 / PRRSV Ery-PPV           | PCV2 / M.hyo / PRRSV | 3 / 28                                      |
| 14   | Upper Austria          | ff            | 90             | PCV2 / Ery-PPV                             | PCV2 / M.hyo         | 3 / 21                                      |
| 15   | Upper Austria          | ff            | 76             | Ery-PPV                                    | PCV2 / M.hyo         | 3 / 28                                      |
| 16   | Lower Saxony           | ff            | 900            | APP / M.hyo / PCV2 / PRRSV / IAV / Ery-PPV | PCV2 / M.hyo / PRRSV | 1 / 28                                      |

**Table S2.** Overview on independent factors used for the statistical analysis. Target were the PCV2 and PCV3 PCR results (nominal/metric).

| <b>Dichotom Independent Factors</b> | <b>Tissue Pools in Category (Suckling Piglets)</b> | <b>OFs in Category (Growing-Fattening)</b> |
|-------------------------------------|----------------------------------------------------|--------------------------------------------|
| PCV2 sow vaccination                | 40/185<br>(21.6 %)                                 | 131/515<br>(25.4 %)                        |
| PCV2 piglet vaccination             | 185/185<br>(100%)                                  | 515/515<br>(100 %)                         |
| PRRSV sow vaccination               | 155/185<br>(73.0 %)                                | 380/515<br>(73.8%)                         |
| PRRSV piglet vaccination            | 84/185<br>(45.4 %)                                 | 213/515<br>(41.4 %)                        |
| IAV sow vaccination                 | 110/185<br>(59.5 %)                                | 321/515<br>(62.3 %)                        |
| M. hyo sow vaccination              | 44/185<br>(23.8 %)                                 | 167/515<br>(32.4 %)                        |
| M. hyo piglet vaccination           | 185/185<br>(100 %)                                 | 515/515<br>(100 %)                         |
| APP sow vaccination                 | 35/185<br>(18.9 %)                                 | 107 /515<br>(20.8 %)                       |
| APP piglet vaccination              | 30/185<br>(16.2%)                                  | 59/515<br>(11.5%)                          |
| Own replacement gilts               | 64/185<br>(34.6 %)                                 | 208/515<br>(40.4 %)                        |
| Sex of the piglets                  | 89/185 male<br>(48.1 %)                            | Not assignable                             |
|                                     | 96/185 female<br>(51.9 %)                          |                                            |
| Individual needles for each litter  | 40/185<br>(21.6 %)                                 | 132/515<br>(25.6 %)                        |
